# Supplementary material for: Broad and potent neutralizing antibodies are elicited in vaccinated individuals following Delta/BA.1 breakthrough infection
Source: PubMed Central journal article supplement (PMC10653880; doi:10.1128/mbio.01206-23), 2023-09-25
Supplement: mbio.01206-23-s0001.pdf [file mbio.01206-23-s0001.pdf]

**Broad and potent neutralizing antibodies are elicited in vaccinated individuals following Delta/BA.1 breakthrough infection**

Jeffrey Seow<sup>1\*</sup>, Zayed A. Shalim<sup>1\*</sup>, Carl Graham<sup>1</sup>, Simon Kimuda<sup>1</sup>, Aswin Pillai<sup>1</sup>, Thomas Lechmere<sup>1</sup>, Ashwini Kurshan<sup>1</sup>, Atika M. Khimji<sup>1</sup>, Luke B. Snell<sup>1,2</sup>, Gaia Nebbia<sup>2</sup>, Christine Mant<sup>1,3</sup>, Anele Waters<sup>4</sup>, Julie Fox<sup>1,4</sup>, Michael H. Malim<sup>1</sup>, Katie J. Doores<sup>1#</sup>

<sup>1</sup> Department of Infectious Diseases, School of Immunology & Microbial Sciences, King's College London, London, UK.

<sup>2</sup> Centre for Clinical Infection and Diagnostics Research, Department of Infectious Diseases, Guy's and St Thomas' NHS Foundation Trust, London, UK.

<sup>3</sup> Infectious Diseases Biobank, Department of Infectious Diseases, School of Immunology and Microbial Sciences, King's College London, London, UK.

<sup>4</sup> Harrison Wing, Guys and St Thomas' NHS Trust, London, UK.

\* These authors contributed equally

# Corresponding author: [katie.doores@kcl.ac.uk](mailto:katie.doores@kcl.ac.uk)

**Figure S1: Sorting strategy for isolation of S1-reactive B cells following infection in vaccinated individuals.** Strategy to isolate SARS-CoV-2 S1-specific IgG<sup>+</sup> B cells. Example sorting for donor VAIN1. Live CD3<sup>+</sup>CD8<sup>-</sup>CD14<sup>-</sup>CD19<sup>+</sup>IgM<sup>-</sup>IgD<sup>-</sup>IgG<sup>+</sup>S1<sup>+</sup>S1<sup>+</sup> cells were sorted into individual wells. The heavy and light chains were reverse transcribed and amplified using nested PCR with gene specific primers<sup>1-3</sup>. Related to Figure 1.

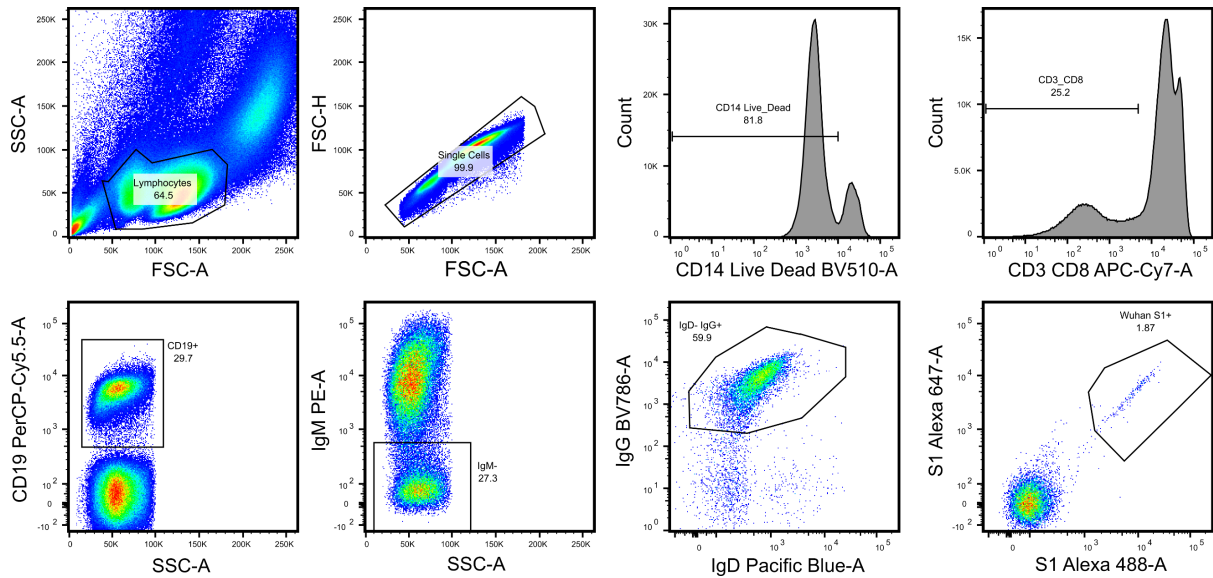

**Figure S2: Plasma cross-neutralizing activity for donors VAIN1, VAIN2 and VAIN3.** Neutralization was tested using HIV-1 viral particles pseudotyped with Spike of Wuhan-1 (WT), beta, delta, BA.1, BA.2 and BA.4/5. Blood samples for plasma isolation were collected 15, 87 and 26 days post infection, respectively. Related to Figure 1.

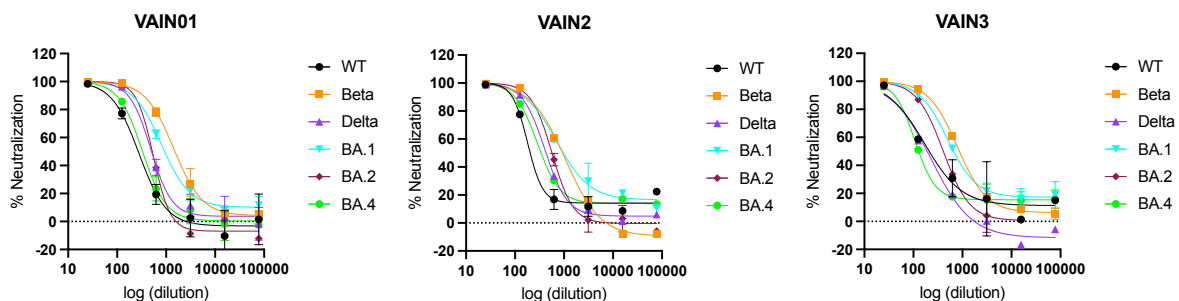

**Figure S3: Comparison between mAbs isolated from VAIN1, VAIN2 and VAIN3. A)**

Truncated violin plot comparing the level of nucleotide mutation from germline for  $V_H$  and  $V_L$  between mAbs isolated from VAIN1, VAIN2 and VAIN3. **B)** Truncated violin plot comparing the level of nucleotide mutation from germline for  $V_H$  and  $V_L$  between B cells selected using WT S1, Delta S1 or BA.1 S1. **C)** Plot comparing the level of nucleotide mutation between WT and VOC selected B cells for donors VAIN1, VAIN2 and VAIN3, respectively. D'Agostino and Pearson tests were performed to determine normality. Based on the result, a Kruskal-Wallis test with Dunn's multiple comparison post hoc test was performed. \* $p < 0.0332$ , \*\* $p < 0.0021$ , \*\*\* $p < 0.0002$ , and \*\*\*\* $p < 0.0001$ . **D)** Correlation of  $V_H$  and  $V_L$  % divergence from germline at the nucleotide level and amino acid level for BTI mAbs. (Spearman correlation, two-tailed,  $r$ ). A linear regression was used to calculate the goodness of fit ( $r^2$ ). **E)** Distribution of CDRH3 lengths for mAbs isolated following BTI and representative naive B cell repertoire<sup>4</sup>. Error bars represent the standard deviation between donors used in the analysis ( $n = 3$  for BTI mAbs and  $n = 10$  for naive repertoire). A bimodal distribution of CDRH3 length is observed for SARS-CoV-2 Spike reactive mAbs. Related to Figure 2.

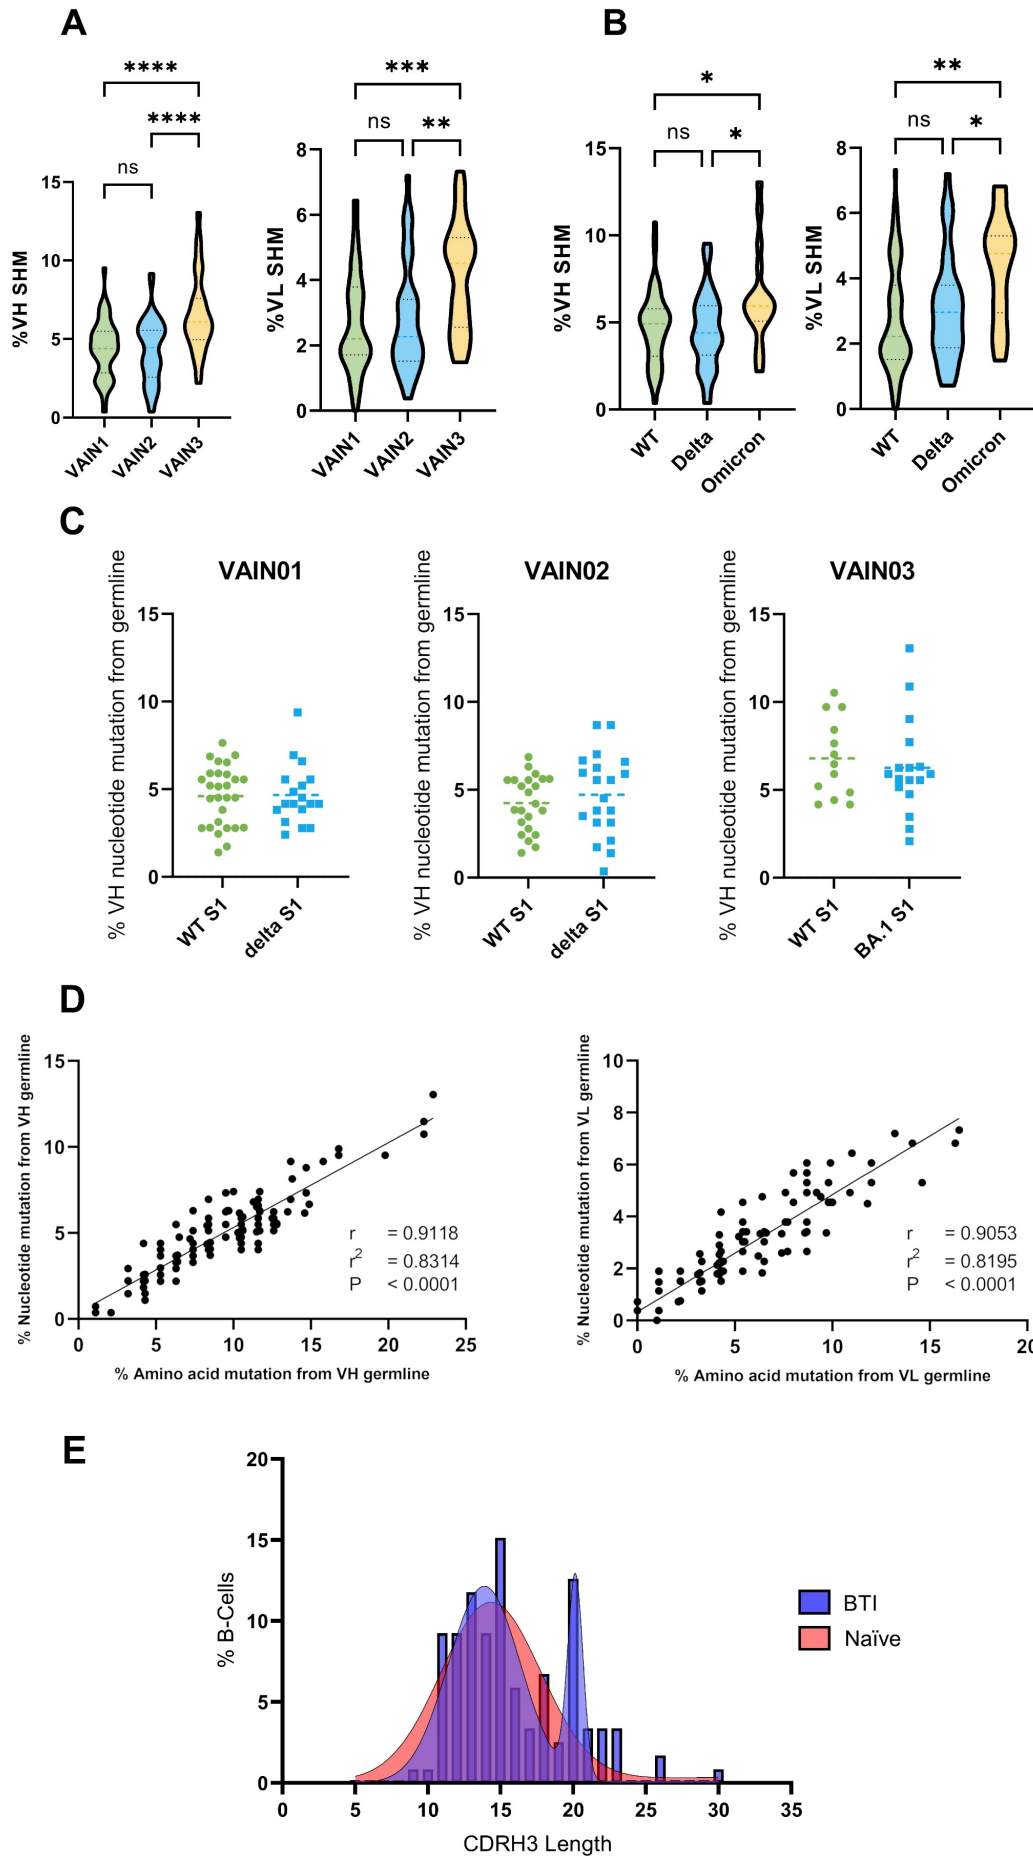

**Figure S4: Correlation between WT and BTI VOC neutralization potency.** **A)** Correlation between IC<sub>50</sub> values against WT and delta (VAIN1 and VAIN2 mAbs) or against WT and BA.1 (VAIN3 mAbs). Delta correlation is shown in purple and BA.1 correlation is shown in blue. **B)** Correlation between IC<sub>50</sub> values and level of somatic hypermutation for mAbs isolated from VAIN1, VAIN2 and VAIN3. Dotted line represents the highest mAb concentration tested. (Spearman correlation,  $r$ . A linear regression was used to calculate the goodness of fit,  $r^2$ ). Significant correlations are highlighted in bold in the table. Related to Figures 2 and 3.

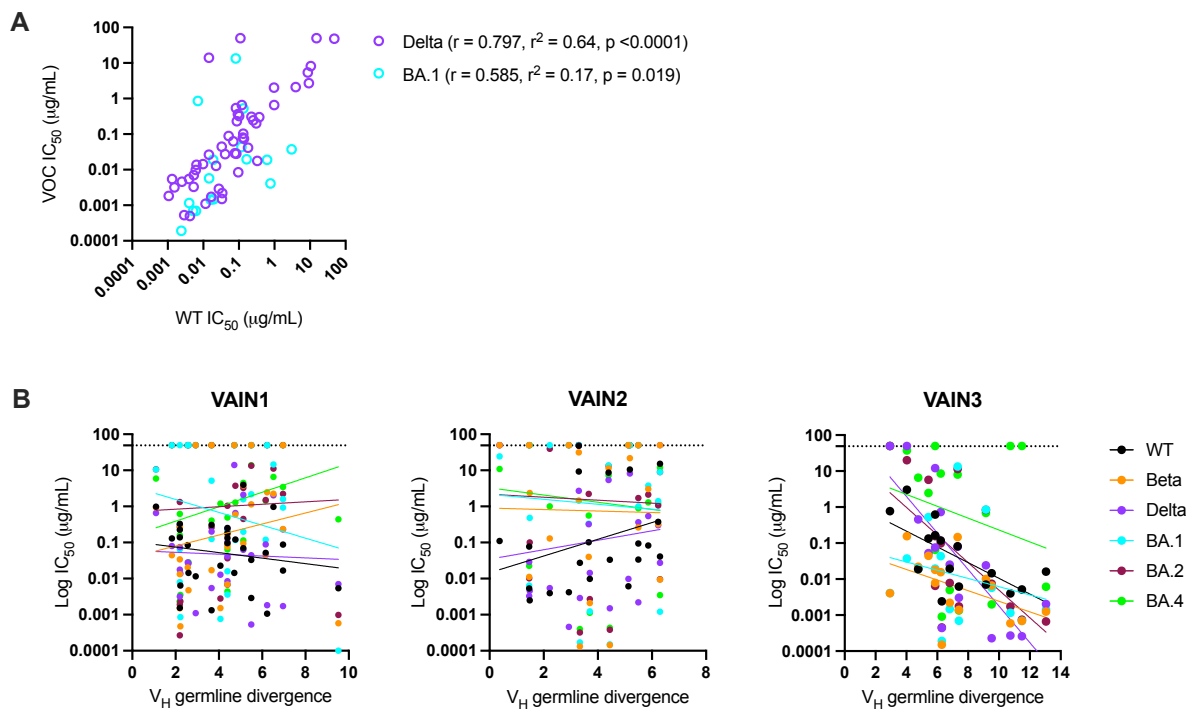

|              | <b>WT</b>                                                                                       | <b>Beta</b>                                                                                     | <b>Delta</b>                                                                                        | <b>BA.1</b>                                | <b>BA.2</b>                                                                                      | <b>BA.4</b>                               |
|--------------|-------------------------------------------------------------------------------------------------|-------------------------------------------------------------------------------------------------|-----------------------------------------------------------------------------------------------------|--------------------------------------------|--------------------------------------------------------------------------------------------------|-------------------------------------------|
| <b>VAIN1</b> | $r^2$ : 0.027<br>$r$ : -0.21<br>$p$ = ns                                                        | $r^2$ : 0.037<br>$r$ : 0.359<br>$p$ = ns                                                        | $r^2$ : 0.0022<br>$r$ : -0.022<br>$p$ = ns                                                          | $r^2$ : 0.042<br>$r$ : -0.073<br>$p$ = ns  | $r^2$ : 0.0015<br>$r$ : 0.14<br>$p$ = ns                                                         | $r^2$ : 0.073<br>$r$ : 0.289<br>$p$ = ns  |
| <b>VAIN2</b> | $r^2$ : 0.098<br>$r$ : 0.346<br>$p$ = ns                                                        | $r^2$ : 0.0003<br>$r$ : -0.103<br>$p$ = ns                                                      | $r^2$ : 0.021<br>$r$ : 0.166<br>$p$ = ns                                                            | $r^2$ : 0.0039<br>$r$ : -0.192<br>$p$ = ns | $r^2$ : 0.0016<br>$r$ : -0.224<br>$p$ = ns                                                       | $r^2$ : 0.009<br>$r$ : -0.166<br>$p$ = ns |
| <b>VAIN3</b> | <b><math>r^2</math>: 0.44</b><br><b><math>r</math>: -0.752</b><br><b><math>p</math> = 0.012</b> | <b><math>r^2</math>: 0.23</b><br><b><math>r</math>: -0.593</b><br><b><math>p</math> = 0.017</b> | <b><math>r^2</math>: 0.61</b><br><b><math>r</math>: -0.841</b><br><b><math>p</math> &lt; 0.0001</b> | $r^2$ : 0.060<br>$r$ : -0.380<br>$p$ = ns  | <b><math>r^2</math>: 0.38</b><br><b><math>r</math>: -0.661</b><br><b><math>p</math> = 0.0065</b> | $r^2$ : 0.061<br>$r$ : -0.235<br>$p$ = ns |

**Figure S5: RBD- and NTD-specific mAbs form multiple competition groups.** Competition for **A)** RBD-specific mAbs and **B)** NTD-specific mAbs. Inhibition of IgG binding to SARS-CoV-2 Spike by F(ab)<sub>2</sub>' fragments was measured. The percentage competition was calculated using the reduction in IgG binding in the presence of F(ab)<sub>2</sub>' (at 100-molar excess of the IC<sub>80</sub>) as a percentage of the maximum IgG binding in the absence of F(ab)<sub>2</sub>. Competition groups clusters were arranged by hand according to binding epitopes. Experiments were performed in duplicate. Competition <25% is white. Grey boxes indicate competition not tested. Competition groups are colour-coded according to the key. Related to Figures 4 and 5.

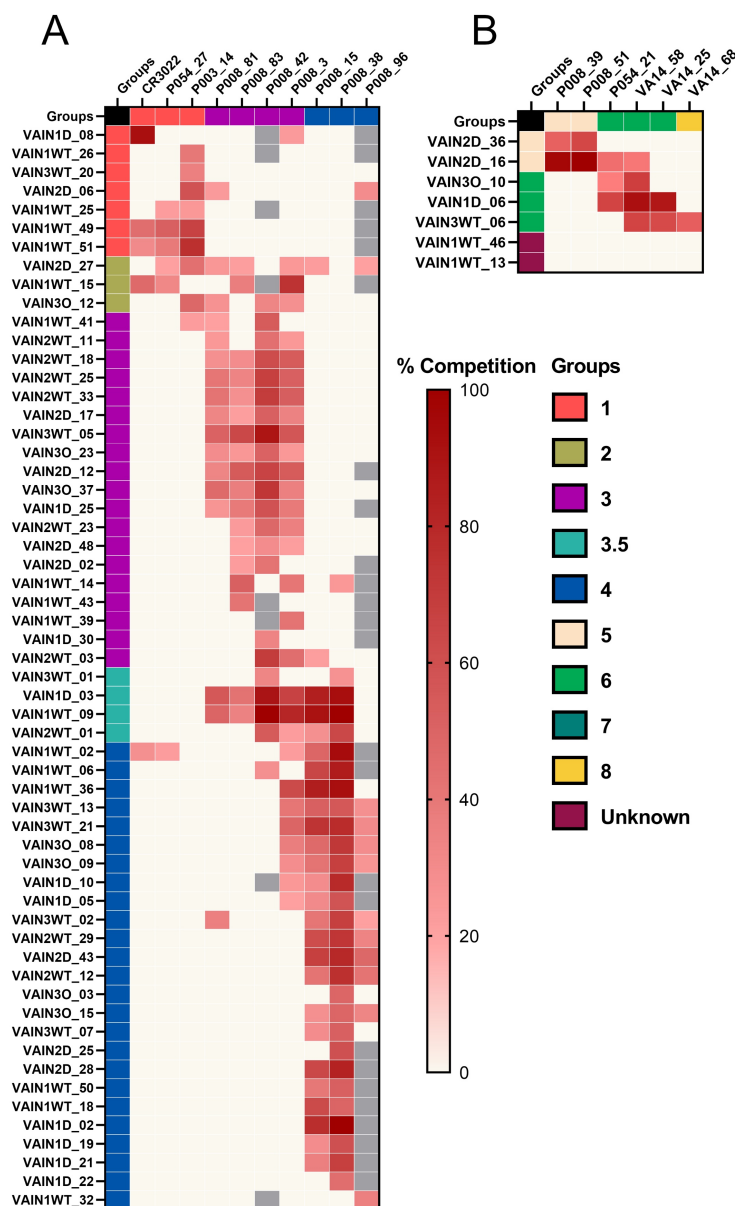

**Figure S6: RBD-specific mAb neutralization geometric mean  $IC_{50}$  against SARS-CoV-2 VOCs by competition group.** Dotted line represents the highest mAb concentration tested. The horizontal line shows the geometric mean  $IC_{50}$  for each RBD competition group. Related to Figure 4.

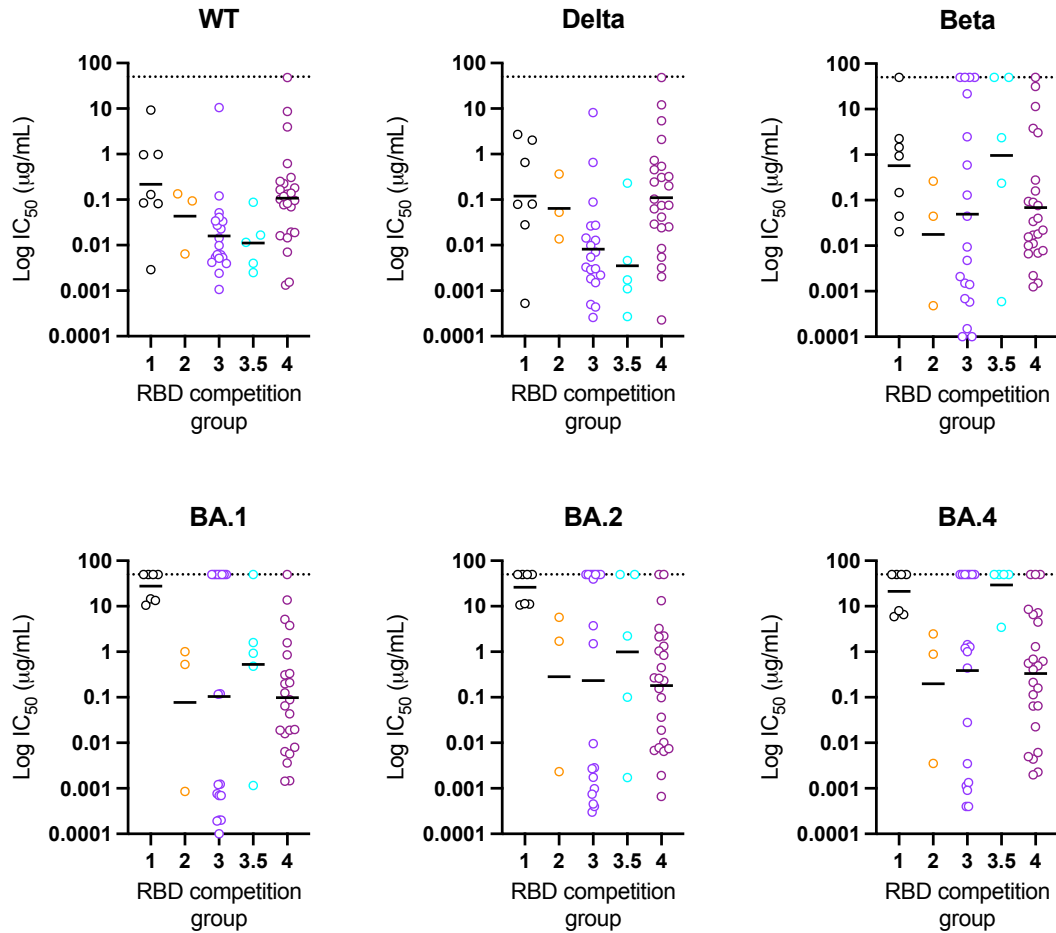

**Figure S7: VAIN1, VAIN2 and VAIN3 plasma neutralization against BA.2.75.2, XBB and BQ.1.1.** Related to Figure 6.

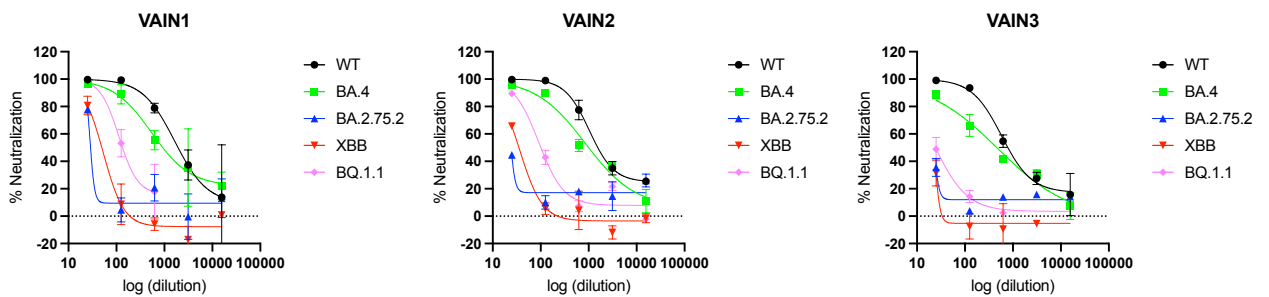

**Supplementary Table 1: VAIN1, VAIN2 and VAIN3 donor information.** Dates for vaccination and SARS-CoV-2 infection and the days between these events and blood donation. Related to Figure 1.

|                                                  | VAIN1                                    | VAIN2                                       | VAIN3                                    |
|--------------------------------------------------|------------------------------------------|---------------------------------------------|------------------------------------------|
| <i>Gender</i>                                    | Female                                   | Male                                        | Female                                   |
| <i>Ethnicity</i>                                 | White                                    | White                                       | White                                    |
| <i>Age</i>                                       | na                                       | 42                                          | 32                                       |
| <i>1<sup>st</sup> Vaccine<br/>(Vaccine type)</i> | 12/01/2021<br>(Pfizer mRNA:BNT162b2)     | 21/01/2021<br>(Pfizer mRNA:BNT162b2)        | 21/05/2021<br>(Pfizer mRNA:BNT162b2)     |
| <i>2<sup>nd</sup> Vaccine<br/>(Vaccine type)</i> | 02/03/2021<br>(Pfizer mRNA:BNT162b2)     | 03/03/2021<br>(Pfizer mRNA:BNT162b2)        | 01/07/2021<br>(Pfizer mRNA:BNT162b2)     |
| <i>Infection date and<br/>SARS-CoV-2 strain</i>  | 11/08/2021<br>Presumed Delta (B.1.617.2) | 23/08/2021<br>Presumed Delta<br>(B.1.617.2) | 18/12/2021<br>Presumed Omicron<br>(BA.1) |
| <i>PBMC sample date</i>                          | 26/08/2021                               | 18/11/2021                                  | 13/01/2022                               |
| <i>Days post 2<sup>nd</sup> vaccine</i>          | 163                                      | 173                                         | 170                                      |
| <i>Days post infection</i>                       | 15                                       | 87                                          | 26                                       |

**Supplementary Table 2: Clonally related mAbs isolated from VAIN1, VAIN2 and VAIN3.**

| Donor  | Name     | Heavy V gene       | Heavy CDR3 AA                | Heavy CDR3 length | Light V gene | Light CDR3 AA  | Light CDR3 length |
|--------|----------|--------------------|------------------------------|-------------------|--------------|----------------|-------------------|
| VAIN1  | V1D_10   | IGHV1-3            | CARGPEMAIVDYFDYW             | 16                | IGKV1-5      | CQQYNGYPWTF    | 11                |
|        | V1D_22   | IGHV1-3            | CARSGGGFLVDYMDVW             | 16                | IGKV1-5      | CQQYHGYPWTF    | 11                |
| VAIN2  | V2WT_30  | IGHV3-30           | CARDGKTINMVRGVISGAFDIW       | 22                | IGKV1-33     | CQQYDNLPPFTF   | 11                |
|        | V2D_42   | IGHV3-30           | CARDGRTINMVRGVISGAFDIW       | 22                | IGKV1-33     | CLQYDILPPFTF   | 11                |
|        | V2WT_11  | IGHV3-30           | CARDGRTITMVRGVISGAFDIW       | 22                | IGKV1-33     | CQQYDNLPPFTF   | 11                |
|        | V2WT_23  | IGHV3-30           | CARDGRTITMVRGVISGAFDIW       | 22                | IGKV1-33     | CQQYDNLPPSTF   | 11                |
|        | V2D_48   | IGHV3-30           | CARDGTMAPLVPGIMSPAFDIW       | 22                | IGKV1-33     | CQQYDNLPPFTF   | 11                |
|        | V2WT_33  | IGHV3-53           | CARDLELAGALDVW               | 14                | IGKV1-9      | CQQINSNPPVTF   | 12                |
|        | V2WT_25  | IGHV3-53           | CARDLELAGGLDIW               | 14                | IGKV1-9      | CQQLNSYPPVTF   | 12                |
|        | V2D_34   | IGHV4-59           | CARDLTYGEYEGWFDPW            | 17                | IGKV1-12     | CQQAHSFPYTF    | 11                |
| VAIN3  | V3O_21   | IGHV1-69           | CAIVFGDQSEFDSW               | 14                | IGKV3-11     | CQFRSNWPPYTF   | 12                |
|        | V3O_28   | IGHV1-69           | CAIVFGDQSEFDSW               | 14                | IGKV3-11     | CQFRSNWPPYTF   | 12                |
|        | V3WT_11  | IGHV3-15           | CTTDIYILGVMIEHDAFDSW         | 20                | IGKV1-39     | CQQTYYTTPAPSF  | 12                |
|        | V3O_27   | IGHV3-15           | CTTDLYILGVVIEHDAFDIW         | 20                | IGKV1-39     | CQQTYFAPALTF   | 12                |
|        | V3O_37   | IGHV3-53           | CARDFGEMYFDYW                | 13                | IGKV3-20     | CQQYGNSPRTF    | 11                |
|        | V3WT_18  | IGHV3-53           | CARDYGEMYFDFW                | 13                | IGKV3-20     | CQQYGGSPRTF    | 11                |
|        | V3O_26   | IGHV3-66           | CARGFGDQYFDLW                | 13                | IGKV1-39     | CQQSYSYPLTF    | 11                |
|        | V3WT_5   | IGHV3-66           | CARGIGDQYFDLW                | 13                | IGKV1-39     | CQQSYSSPLTF    | 11                |
|        | V3WT_9   | IGHV3-7            | CARGGGHPWYYSGSGSYPPLPKADLDYW | 28                | IGLV1-44     | CVAWDDSLKGSWVF | 14                |
|        | V3WT_6   | IGHV3-7            | CARGGGHPWYYSSGNFPPLPKADLDYW  | 28                | IGLV1-44     | CVAWDDSLKGSWVF | 14                |
| V3O_23 | IGHV4-34 | CARACSGGNCYPRPFDYW | 18                           | IGKV1-17          | CLQHNSYPWTF  | 11             |                   |
| V3WT_1 | IGHV4-34 | CARGCSGGICYPKPFDFW | 18                           | IGKV1-17          | CLQHNSLPWTF  | 11             |                   |

Related to Figure 2.



**Supplementary Table 3: Neutralization properties of large-scale expressed nAbs.** mAb are listed based on competition group. IC<sub>50</sub> values are reported in µg/mL. X indicates neutralization not tested. Related to Figures 1-6.

| Name       | IC50 WT | IC50 Beta | IC50 Delta | IC50 Omicron | IC50 BA2 | IC50 BA4 | IC50 D614G | IC50 BA.4 | IC50 XBB | IC50 BQ.1.1 | IC50 BA.2.75.2 | IC50 XBB.1.5 | ACE2 Comp | Specificity | Comp Group | Heavy chain V Gene | Heavy chain CDR3 AA            | Light chain V gene | Light chain CDR3 AA |
|------------|---------|-----------|------------|--------------|----------|----------|------------|-----------|----------|-------------|----------------|--------------|-----------|-------------|------------|--------------------|--------------------------------|--------------------|---------------------|
| VAIN1WT_49 | 0.977   | 2.243     | 2.022      | 14.508       | 11.144   | 6.592    | 6.317      | 10.786    | >50      | >50         | 2.016          | >50          | 24        | RBD         | 1          | IGHV4-39           | CARHLEELPRKGVNWFDPW            | IGKV1-39           | CQQSYATLPPYTF       |
| VAIN1D_08  | 0.003   | >50       | 0.001      | >50          | >50      | >50      | 0.001      | >50       | >50      | >50         | >50            | >50          | 0         | RBD         | 1          | IGHV1-69           | CARGPPLTRGVARQAQAFDYM          | IGKV4-1            | CQQYSSSITF          |
| VAIN1WT_51 | 0.980   | 0.940     | 0.654      | 10.558       | 10.620   | 5.946    | 3.323      | 4.205     | 10.438   | 17.792      | 15.575         | X            | 0         | RBD         | 1          | IGHV3-30           | CATDSSDFWQNYFDYW               | IGKV1-39           | CQQSYSTFEYTF        |
| VAIN1WT_25 | 0.130   | 0.044     | 0.080      | >50          | >50      | >50      | X          | X         | X        | X           | X              | X            | 99        | RBD         | 1          | IGHV5-10-1         | CARGPSYYHTGRMGDVM              | IGKV1-33           | CLQYDSLLGTGTF       |
| VAIN1WT_26 | 0.084   | 0.020     | 0.028      | >50          | >50      | >50      | X          | X         | X        | X           | X              | X            | 98        | RBD         | 1          | IGHV1-69           | CACGGYDTSGYALDFDSW             | IGKV1-5            | CQQFNSYRFT          |
| VAIN2D_06  | 9.274   | 1.457     | 2.700      | >50          | >50      | >50      | X          | X         | X        | X           | X              | X            | 92        | RBD         | 1          | IGHV3-23           | CAEPRTGWYVGFDFW                | IGLV6-57           | CQSYDSSNHYVF        |
| VAIN3WT_20 | 0.082   | 0.147     | 0.079      | 13.395       | 11.448   | 7.948    | X          | X         | X        | X           | X              | X            | 94        | RBD         | 1          | IGHV3-11           | CARQKWLRLGDFDSW                | IGLV6-57           | CQSYDSSNHYVF        |
| VAIN2D_27  | 0.093   | 0.262     | 0.365      | 1.002        | 1.700    | 0.891    | 0.235      | 1.251     | 0.495    | 0.436       | 0.401          | 3.159        | 78        | RBD         | 2          | IGHV3-30           | CARDWGLRVLWFDNW                | IGKV1-39           | CQQSYSTPWF          |
| VAIN3D_12  | 0.135   | 0.044     | 0.053      | 0.529        | 5.745    | 2.475    | 0.008      | 1.849     | 2.176    | 3.916       | 2.337          | 3.076        | 86        | RBD         | 2          | IGHV4-61           | CARDLWYDRSGHYDSDAFDVM          | IGLV1-40           | CQSYDSSLTALF        |
| VAIN1WT_15 | 0.006   | 0.0005    | 0.014      | 0.001        | 0.002    | 0.004    | 0.023      | 0.001     | >50      | 9.567       | >50            | >50          | 100       | RBD         | 2          | IGHV3-53           | CARDLVVYGMVMW                  | IGKV1-9            | CQQYDNLDSIF         |
| VAIN2D_12  | 0.010   | 0.002     | 0.014      | 0.001        | 0.003    | 0.001    | 0.008      | 0.003     | 0.004    | 0.004       | 0.005          | 0.002        | 99        | RBD         | 3          | IGHV3-66           | CARAYGDRYVFDYM                 | IGKV1-5            | CQHYGAF             |
| VAIN2D_17  | 0.041   | 0.009     | 0.027      | 0.001        | 0.010    | 0.003    | 0.061      | 0.008     | 0.015    | 0.011       | 0.015          | 0.003        | 99        | RBD         | 3          | IGHV3-53           | CARDFYRQSGDYPHDFW              | IGKV1-33           | CHQYDNLPRFT         |
| VAIN3D_37  | 0.002   | 0.0002    | 0.0004     | 0.0002       | 0.0005   | 0.001    | 0.004      | 0.001     | 1.347    | 0.051       | 0.474          | 0.147        | 97        | RBD         | 3          | IGHV3-53           | CARDFGMYFDYM                   | IGKV3-20           | CQQYDNLPRFT         |
| VAIN1WT_14 | 0.014   | 0.005     | 0.027      | >50          | >50      | 0.028    | 0.005      | 0.028     | 0.250    | 0.281       | 0.479          | 0.106        | 97        | RBD         | 3          | IGHV3-53           | CARLYNHRMGDMVM                 | IGKV1-33           | CQQYDNLPRFT         |
| VAIN2WT_33 | 0.033   | 0.0001    | 0.002      | 0.0002       | 0.0004   | 0.0004   | 0.005      | 0.001     | >50      | 0.103       | 1.699          | 1.211        | 94        | RBD         | 3          | IGHV3-53           | CARDLELALGALDVM                | IGKV1-9            | CQQYDNLPRFT         |
| VAIN2WT_25 | 0.028   | 0.0001    | 0.003      | 0.0002       | 0.0003   | 0.0004   | 0.013      | 0.002     | >50      | 0.219       | 13.184         | >50          | 93        | RBD         | 3          | IGHV3-53           | CARDLELALGALDVM                | IGKV1-9            | CQQYDNLPRFT         |
| VAIN3WT_05 | 0.006   | 0.001     | 0.003      | 0.001        | 0.002    | 0.001    | 0.002      | 0.001     | >50      | 2.527       | 2.477          | >50          | 99        | RBD         | 3          | IGHV3-66           | CARGIDQVYFDLM                  | IGKV1-39           | CQQYDNLPRFT         |
| VAIN1D_30  | 0.034   | >50       | 0.002      | >50          | >50      | >50      | 0.034      | >50       | >50      | >50         | >50            | >50          | 98        | RBD         | 3          | IGHV3-64           | CVKGGIQLWFTGDSW                | IGKV1-5            | CQQYDNLPRFT         |
| VAIN3D_23  | 0.005   | 0.001     | 0.0003     | 0.001        | 0.001    | >50      | 0.001      | >50       | >50      | >50         | >50            | >50          | 97        | RBD         | 3          | IGHV4-34           | CARACSGGNCYPRFDFW              | IGKV1-17           | CLQYDNLPRFT         |
| VAIN2WT_23 | 0.004   | >50       | 0.0005     | >50          | >50      | >50      | 0.004      | >50       | >50      | >50         | >50            | >50          | 89        | RBD         | 3          | IGHV3-30           | CARDGRTITMVRGVISGAFDIW         | IGKV1-33           | CQQYDNLPRFT         |
| VAIN2D_48  | 0.034   | >50       | 0.002      | >50          | >50      | >50      | 0.034      | >50       | >50      | >50         | >50            | >50          | 90        | RBD         | 3          | IGHV3-30           | CARDGTMAPLVPFGIMSPAFDIW        | IGKV1-33           | CQQYDNLPRFT         |
| VAIN1D_25  | 0.023   | 0.002     | 0.013      | 0.001        | 0.003    | 1.191    | 0.005      | 0.756     | >50      | >50         | >50            | X            | 99        | RBD         | 3          | IGHV3-53           | CARDLAPVGLMDVM                 | IGKV1-27           | CQYDNLPRFT          |
| VAIN1WT_43 | 0.121   | 0.594     | 0.660      | 0.117        | 3.754    | 1.287    | 2.210      | 6.019     | 10.646   | 34.975      | 13.252         | X            | 0         | RBD         | 3          | IGHV3-33           | CARDEGAVVTHMDVM                | IGKV1-39           | CQQSYDNLPRFT        |
| VAIN1WT_39 | 0.001   | 2.460     | 0.002      | >50          | >50      | >50      | X          | X         | X        | X           | X              | X            | 99        | RBD         | 3          | IGHV5-10-1         | CARGSGDYFDLLAYFDLM             | IGKV3-20           | CQQYDNLPRFT         |
| VAIN2WT_11 | 0.005   | >50       | 0.003      | >50          | >50      | >50      | X          | X         | X        | X           | X              | X            | 81        | RBD         | 3          | IGHV3-30           | CARDGRTITMVRGVISGAFDIW         | IGKV1-33           | CQQYDNLPRFT         |
| VAIN2WT_18 | 10.565  | 21.841    | 8.213      | >50          | >50      | >50      | X          | X         | X        | X           | X              | X            | 18        | RBD         | 3          | IGHV3-53           | CARVLPYGMVYFDVM                | IGKV3-11           | CQQLFTF             |
| VAIN2D_02  | 0.004   | 0.130     | 0.005      | >50          | 39.604   | 1.000    | X          | X         | X        | X           | X              | X            | 99        | RBD         | 3          | IGHV3-66           | CARNVWDDAFDLW                  | IGKV1-9            | CQQYDNLPRFT         |
| VAIN1WT_41 | 0.051   | 0.044     | 0.089      | 0.120        | 1.498    | 1.431    | X          | X         | X        | X           | X              | X            | 95        | RBD         | 3          | IGHV4-39           | CARTAPYYIDRSYGYKEEYFQRM        | IGKV1-5            | CQQYDNLPRFT         |
| VAIN2WT_03 | 0.006   | >50       | 0.010      | >50          | >50      | >50      | X          | X         | X        | X           | X              | X            | 0         | RBD         | 3          | IGHV3-30-3         | CARDGTMAPLVPFGIMSPAFDIW        | IGKV1-33           | CQQYDNLPRFT         |
| VAIN3WT_01 | 0.004   | 0.001     | 0.0003     | 0.001        | 0.002    | >50      | 0.002      | >50       | >50      | >50         | >50            | >50          | 0         | RBD         | 3.5        | IGHV4-34           | CARGCSGGICYPRFDFW              | IGKV1-17           | CLQYDNLPRFT         |
| VAIN2WT_01 | 0.002   | 2.352     | 0.005      | 0.482        | 0.101    | >50      | 0.001      | >50       | >50      | 31.732      | 6.108          | X            | 99        | RBD         | 3.5        | IGHV3-53           | CARESYAVATIGKEYMMDVM           | IGKV3-11           | CQQYDNLPRFT         |
| VAIN1WT_09 | 0.012   | >50       | 0.001      | >50          | >50      | >50      | X          | X         | X        | X           | X              | X            | 76        | RBD         | 3.5        | IGHV1-8            | CARGGRYCDITSCYSRGMWLDPM        | IGLV1-5            | CQTWDLGLVVF         |
| VAIN1D_03  | 0.017   | >50       | 0.002      | 1.587        | >50      | >50      | X          | X         | X        | X           | X              | X            | 0         | RBD         | 3.5        | IGHV1-2            | CARDQSFMSVRGDTDHW              | IGKV1-39           | CQQYDNLPRFT         |
| VAIN1WT_02 | 0.088   | 0.236     | 0.230      | 0.923        | 2.235    | 3.429    | X          | X         | X        | X           | X              | X            | 57        | RBD         | 3.5        | IGHV1-46           | CARAGVAPDHSHPDFDW              | IGKV1-13           | CQQYDNLPRFT         |
| VAIN1WT_06 | 0.025   | 0.276     | 0.306      | 0.310        | 1.326    | 0.620    | 2.334      | 4.325     | 1.289    | 4.834       | 7.452          | 1.551        | 72        | RBD         | 4          | IGHV1-18           | CARGPWGYSQTSYTYTPDNPAYSYHGMWDM | IGKV4-24           | CMQYDNLPRFT         |
| VAIN1WT_18 | 0.070   | 0.094     | 0.063      | 0.198        | 0.447    | 0.114    | 0.180      | 0.613     | 0.288    | 0.538       | 0.539          | 0.678        | 0         | RBD         | 4          | IGHV5-51           | CARQFCGGGCHFDYW                | IGKV1-5            | CQQYDNLPRFT         |
| VAIN1WT_32 | 0.133   | 0.090     | 0.103      | 0.089        | 0.233    | 0.212    | 0.265      | 0.261     | 0.713    | 2.042       | 2.976          | 0.843        | 28        | RBD         | 4          | IGHV5-51           | CARSDTSNYFDYM                  | IGKV1-5            | CQQYDNLPRFT         |
| VAIN1WT_50 | 0.251   | 0.160     | 0.245      | 0.210        | 1.036    | 0.494    | 2.340      | 1.597     | 2.329    | 3.862       | 1.907          | 2.044        | 0         | RBD         | 4          | IGHV1-69           | CAKGGYSGYGHYVNFDFW             | IGKV4-1            | CQQYDNLPRFT         |
| VAIN1D_19  | 0.139   | 0.034     | 0.075      | 0.065        | 0.268    | 0.160    | 0.182      | 0.067     | 0.142    | 1.392       | 1.093          | 0.128        | 4         | RBD         | 4          | IGHV5-51           | CARTLQTNWLDHW                  | IGKV1-5            | CQQYDNLPRFT         |
| VAIN2WT_29 | 0.102   | 0.040     | 0.320      | 0.332        | 2.220    | 0.557    | 0.102      | 0.557     | 4.580    | 4.338       | 1.787          | 1.244        | 18        | RBD         | 4          | IGHV5-51           | CARRTSAGLPLCLDVM               | IGKV1-39           | CQQYDNLPRFT         |
| VAIN2D_28  | 0.083   | 3.039     | 0.540      | 3.786        | 2.133    | 1.300    | 5.469      | 2.688     | 0.744    | 1.007       | 2.138          | 2.637        | 60        | RBD         | 4          | IGHV3-48           | CARDTGFWSHYPAQFDYW             | IGKV1-33           | CQQYDNLPRFT         |
| VAIN2D_25  | 0.078   | 0.011     | 0.029      | 0.006        | 0.010    | 0.023    | 0.550      | 0.153     | 0.278    | >50         | 0.183          | 1.016        | 54        | RBD         | 4          | IGHV5-51           | CARRDSGYSYGFYDLW               | IGLV1-44           | CAAWDSSLGWF         |
| VAIN3D_09  | 0.016   | 0.001     | 0.002      | 0.001        | 0.001    | 0.006    | 0.006      | 0.004     | 0.038    | >50         | 0.034          | 0.028        | 97        | RBD         | 4          | IGHV4-39           | CTRMVAVQWYGAIDYM               | IGLV3-21           | CQWYDNLPRFT         |
| VAIN3D_15  | 0.015   | 0.007     | 0.0002     | 0.006        | 0.007    | 0.002    | 0.013      | 0.001     | 0.041    | >50         | 0.009          | 0.049        | 0         | RBD         | 4          | IGHV4-31           | CARGIPDSAVNSW                  | IGLV1-40           | CQWYDNLPRFT         |
| VAIN1D_05  | 0.181   | 0.077     | 0.042      | 0.016        | 0.037    | 0.064    | 0.144      | 0.229     | 0.766    | >50         | 0.233          | 0.646        | 0         | RBD         | 4          | IGHV1-69           | CARDMIEAPLYGMDVM               | IGKV1-39           | CQQYDNLPRFT         |
| VAIN1D_22  | 0.096   | 0.007     | 0.008      | 0.004        | 0.007    | 0.004    | 0.017      | 0.003     | >50      | >50         | 1.785          | >50          | 0         | RBD         | 4          | IGHV1-3            | CARSGGGLVDYMDVM                | IGKV1-5            | CQQYDNLPRFT         |
| VAIN3WT_07 | 0.019   | 0.002     | 0.025      | 0.001        | 0.008    | 0.005    | 0.001      | 0.001     | >50      | >50         | 0.093          | >50          | 96        | RBD         | 4          | IGHV3-15           | CVTDLFVQVILEHDAFDIW            | IGKV1-39           | CQQYDNLPRFT         |
| VAIN3D_03  | 0.164   | 0.008     | 0.075      | 0.020        | 0.007    | 0.065    | 0.033      | 0.030     | >50      | >50         | 0.240          | >50          | 0         | RBD         | 4          | IGHV3-9            | CVKEKIRLREGEQMDVM              | IGLV3-21           | CQWYDNLPRFT         |
| VAIN3WT_13 | 0.007   | 0.010     | 0.024      | 0.857        | 0.834    | 0.688    | 0.004      | 0.272     | >50      | >50         | >50            | >50          | 95        | RBD         | 4          | IGHV1-18           | CARDSSVAGSLDYM                 | IGLV2-14           | CSSYDNLPRFT         |
| VAIN1D_10  | 0.002   | 0.001     | 0.003      | 0.008        | 0.002    | 0.002    | 0.001      | 0.0003    | >50      | >50         | >50            | >50          | 9         | RBD         | 4          | IGHV1-3            | CARGPEMAYVDFDYM                | IGKV1-5            | CQQYDNLPRFT         |
| VAIN3WT_02 | 0.619   | 0.018     | 12.037     | 0.019        | 0.156    | >50      | 0.085      | >50       | >50      | >50         | 0.002          | >50          | 0         | RBD         | 4          | IGHV1-46           | CARSHSVTLAGVDYM                | IGLV7-43           | CLLYEYGANVF         |
| VAIN2D_43  | 48.000  | 31.281    | 48.000     | >50          | >50      | >50      | 48.000     | >50       | >50      | >50         | >50            | >50          | 19        | RBD         | 4          | IGHV3-30           | CAKDRSWFGEFQDDNYYYAMDVM        | IGKV1-33           | CQQYDNLPRFT         |
| VAIN3WT_21 | 0.019   | 0.022     | 0.454      | 0.019        | 0.019    | 6.590    | X          | X         | X        | X           | X              | X            | 78        | RBD         | 4          | IGHV3-30           | CVSFSASGTYPLFYDYM              | IGKV1-33           | CHQYDNLPRFT         |
| VAIN3D_08  | 0.119   | 0.016     | 0.730      | 0.044        | 0.098    | 8.565    | X          | X         | X        | X           | X              | X            | 10        | RBD         | 4          | IGHV3-9            | CAKDLHSGVYLMHADAFDYM           | IGLV1-51           | CQTWDLGLVVF         |
| VAIN1D_02  | 3.956   | 3.792     | 2.104      | 1.573        | 3.262    | 4.502    | X          | X         | X        | X           | X              | X            | 23        | RBD         | 4          | IGHV3-23           | CAKEGYPYCSSSCYVGFDFW           | IGKV1-13           | CQQYDNLPRFT         |
| VAIN1D_21  | 0.308   | 0.017     | 0.202      | 0.125        | 0.260    | 0.406    | X          | X         | X        | X           | X              | X            | 0         | RBD         | 4          | IGHV5-51           | CARSRSSDYFDYM                  | IGKV1-5            | CQQYDNLPRFT         |
| VAIN2WT_12 | 8.648   | 11.377    | 5.392      | 13.725       | 13.283   | 7.194    | X          | X         | X        | X           | X              | X            | 26        | RBD         | 4          | IGHV3-30           | CAKAGYPSAGDCLRQLDYM            | IGKV1-33           | CQQYDNLPRFT         |
| VAIN1WT_36 | 0.001   | >50       | 0.005      | 0.339        | >50      | >50      | X          | X         | X        | X           | X              | X            | 83        | RBD         | 4          | IGHV3-21           | CARNLGASAGVNIHYFYHYMDVM        | IGLV2-23           | CSSYDNLPRFT         |
| VAIN2D_36  | 15.179  | 49.955    | >50        | 9.002        | 9.002    | 11.919   | X          | X         | X        | X           | X              | X            | 60        | NTD         | 5          | IGHV4-34           | CARGLLRIFIPVGGVGFDFW           | IGKV3-15           | CQQYDNLPRFT         |
| VAIN2D_16  | 0.110   | >50       | >50        | 24.364       | >50      | 10.860   | X          | X         | X        | X           | X              | X            | 54        | NTD         | 5          | IGHV4-34           | CARYLQWLVPFGDFW                | IGKV1-39           | CQQYDNLPRFT         |
| VAIN1D_06  | 0.331   | 0.013     | 0.018      | >15          | 0.0003   | 0.002    | 0.023      | 0.0004    | >50      | 0.004       | >50            | >50          | 52        | NTD         | 6          | IGHV1-24           | CATSFAVAGTMEDYSYGYMDVM         | IGKV4-24           | CMQYDNLPRFT         |
| VAIN3WT_06 | 3.043   | 0.157     | >50        | 0.037        | 20.162   | 37.554   | 1.000      | 27.488    | 31.302   | 46.588      | >50            | >50          | 0         | NTD         | 6          | IGHV3-7            | CARGGGHWPYSSSSGFPPLPKADLYW     | IGLV1-44           | CAWDDSLGWF          |
| VAIN3D_10  | 0.772   | 0.004     | >50        | 0.004        | >50      | >50      | X          | X         | X        | X           | X              | X            | 49        | NTD         | 6          | IGHV3-7            | CTRDASNNGELRNRSYMDVM           | IGLV1-44           | CAWDDSLGWF          |
| V          |         |           |            |              |          |          |            |           |          |             |                |              |           |             |            |                    |                                |                    |                     |

**Supplementary Table S4: Mutations present in variant Spikes.** Unique mutations are highlighted in red. Related to Figure 3.

| Variant                    | Spike Mutations                                                                                                                                                                                                                                                                                                                                                              |
|----------------------------|------------------------------------------------------------------------------------------------------------------------------------------------------------------------------------------------------------------------------------------------------------------------------------------------------------------------------------------------------------------------------|
| <b>Beta (B.1.351)</b>      | L18F, <b>D80A</b> , <b>D215G</b> , ( <b>Del 241-243</b> ), K417N, <b>E484K</b> , N501Y, D614G, <b>A701V</b>                                                                                                                                                                                                                                                                  |
| <b>Delta (B.1.617.2)</b>   | <b>T19R</b> , G142D, <b>156del</b> , <b>157del</b> , R158G, L452R, T478K, D614G, <b>P681R</b> , <b>D950N</b>                                                                                                                                                                                                                                                                 |
| <b>Omicron (BA.1)</b>      | A67V, 69-70del, T95I, GVYY142-145D, NL211-212I, ins214EPE, G339D, S371L, S373P, S375F, K417N, N440K, G446S, S477N, T478K, E484A, Q493R, G496S, Q498R, N501Y, Y505H, T547K, D614G, H655Y, N679K, P681H, N764K, D796Y, N856K, Q954H, N969K, L981F                                                                                                                              |
| <b>Omicron (BA.2)</b>      | T19I, LPPA24-27S, G142D, V213G, G339D, S371F, S373P, S375F, T376A, D405N, R408S, K417N, N440K, S477N, T478K, E484A, Q493R, Q498R, N501Y, Y505H, D614G, H655Y, N679K, P681H, N764K, D796Y, Q954H, N969K                                                                                                                                                                       |
| <b>Omicron (BA.4)</b>      | T19I, LPPA24-27S, Del 69-70, G142D, V213G, G339D, S371F, S373P, S375F, T376A, D405N, R408S, K417N, N440K, L452R, S477N, T478K, E484A, F486V, Q498R, N501Y, Y505H, D614G, H655Y, N679K, P681H, N764K, D796Y, Q954H, N969K                                                                                                                                                     |
| <b>Omicron (BA.2.75.2)</b> | T19I, LPPA24-27S, G142D, <b>K147E</b> , <b>W152R</b> , <b>F157L</b> , <b>I210V</b> , V213G, <b>G257S</b> , G339H, S371F, S373P, S375F, T376A, D405N, R408S, K417N, N440K, G446N, N460K, S477N, T478K, E484A, Q498R, N501Y, Y505H, D614G, H655Y, N679K, P681H, N764K, D796Y, Q954H, N969K                                                                                     |
| <b>Omicron (BQ1.1)</b>     | T19I, LPPA24-27S, H69del, V70del, V213G, G142D, G339D, R346T, S371F, S373P, S375F, T376A, D405N, R408S, K417N, N440K, <b>K444T</b> , L452R, N460K, S477N, T478K, E484A, F486V, Q498R, N501Y, Y505H, D614G, H655Y, N679K, P681H, N764K, D796Y, Q954H, N969K                                                                                                                   |
| <b>Omicron (XBB)</b>       | T19I, LPPA24-27S, <b>V83A</b> , G142D, <b>Del144</b> , <b>H146Q</b> , <b>Q183E</b> , <b>V213E</b> , <b>G252V</b> , G339H, R346T, L368I, S371F, S373P, S375F, T376A, D405N, R408S, K417N, N440K, <b>V445P</b> , G446S, N460K, S477N, T478K, E484A, F486S ( <b>XBB1.5: F486P</b> ), <b>F490S</b> , Q498R, N501Y, Y505H, D614G, H655Y, N679K, P681H, N764K, D796Y, Q954H, N969K |

#### References:

- 1 Scheid, J. F. *et al.* Broad diversity of neutralizing antibodies isolated from memory B cells in HIV-infected individuals. *Nature* **458**, 636-640, doi:10.1038/nature07930 (2009).
- 2 Tiller, T. *et al.* Efficient generation of monoclonal antibodies from single human B cells by single cell RT-PCR and expression vector cloning. *J Immunol Methods* **329**, 112-124, doi:10.1016/j.jim.2007.09.017 (2008).
- 3 von Boehmer, L. *et al.* Sequencing and cloning of antigen-specific antibodies from mouse memory B cells. *Nat Protoc* **11**, 1908-1923, doi:10.1038/nprot.2016.102 (2016).
- 4 Briney, B., Inderbitzin, A., Joyce, C. & Burton, D. R. Commonality despite exceptional diversity in the baseline human antibody repertoire. *Nature* **566**, 393-397, doi:10.1038/s41586-019-0879-y (2019).
